# Supplementary material
Source: publisher site journal article supplement (https://www.spandidos-publications.com/7143/downloadSupplementary)
Supplement: Supplementary file 1 [file downloadSupplementary]

## Sheet: Sheet1
Table SI. List of the identification (ID) for each of the 486 blood metabolites.
ID	Metabolites
M00053	glutamine
M00054	tryptophan
M00059	histidine
M00060	leucine
M00063	cholesterol
M00064	phenylalanine
M00513	creatinine
M00527	lactate
M00542	3-hydroxybutyrate (BHBA)
M00553	cotinine
M00569	caffeine
M00575	arabinose
M00577	fructose
M00584	mannose
M00599	pyruvate
M00606	uridine
M01105	linoleate (18:2n6)
M01107	allantoin
M01110	arachidonate (20:4n6)
M01114	deoxycholate
M01121	margarate (17:0)
M01123	inosine
M01125	isoleucine
M01284	threonine
M01299	tyrosine
M01301	lysine
M01302	methionine
M01303	malate
M01336	palmitate (16:0)
M01356	nonadecanoate (19:0)
M01358	stearate (18:0)
M01359	oleate (18:1n9)
M01361	pentadecanoate (15:0)
M01365	myristate (14:0)
M01444	pipecolate
M01493	ornithine
M01494	5-oxoproline
M01508	pantothenate
M01515	salicylate
M01558	4-acetamidobutanoate
M01561	alpha-tocopherol
M01564	citrate
M01572	glycerate
M01573	guanosine
M01585	N-acetylalanine
M01604	urate
M01605	ursodeoxycholate
M01638	arginine
M01640	ascorbate (Vitamin C)
M01644	heptanoate (7:0)
M01645	laurate (12:0)
M01649	valine
M01670	urea
M01712	cortisol
M01769	cortisone
M01898	proline
M02132	citrulline
M02137	biliverdin
M02342	serotonin (5HT)
M02730	gamma-glutamylglutamine
M02734	gamma-glutamyltyrosine
M03127	hypoxanthine
M03141	betaine
M03147	xanthine
M10642	caprate (10:0)
M11438	phosphate
M12017	3-methoxytyrosine
M12035	pelargonate (9:0)
M12067	undecanoate (11:0)
M12129	beta-hydroxyisovalerate
M12261	taurodeoxycholate
M12593	X-02973
M12626	X-03003
M12768	X-03088
M12774	X-03094
M15122	glycerol
M15140	kynurenine
M15335	mannitol
M15365	glycerol 3-phosphate (G3P)
M15488	acetylphosphate
M15500	carnitine
M15506	choline
M15630	N-acetylornithine
M15650	N1-methyladenosine
M15676	3-methyl-2-oxovalerate
M15677	3-methylhistidine
M15749	3-phenylpropionate (hydrocinnamate)
M15753	hippurate
M15778	benzoate
M15958	phenylacetate
M15990	glycerophosphorylcholine (GPC)
M15996	aspartate
M16634	X-04357
M16816	X-04494
M16818	X-04495
M16821	X-04498
M16822	X-04499
M16823	X-04500
M17799	ibuprofen
M17805	dihomo-linoleate (20:2n6)
M17807	X-18601
M17945	2-hydroxystearate
M18254	paraxanthine
M18281	2-hydroxyhippurate (salicylurate)
M18283	X-05426
M18335	quinate
M18349	indolelactate
M18357	glycylvaline
M18369	gamma-glutamylleucine
M18392	theobromine
M18394	theophylline
M18467	eicosapentaenoate (EPA; 20:5n3)
M18474	estrone 3-sulfate
M18476	glycocholate
M18477	glycodeoxycholate
M18494	taurochenodeoxycholate
M18497	taurocholate
M18929	X-05907
M19323	docosahexaenoate (DHA; 22:6n3)
M19324	1-stearoylglycerophosphoinositol
M19362	X-06226
M19364	X-06246
M19368	X-06267
M19396	X-06307
M19414	X-06350
M19415	X-06351
M19934	myo-inositol
M20489	glucose
M20675	1,5-anhydroglucitol (1,5-AG)
M20699	erythritol
M21044	2-hydroxybutyrate (AHB)
M21047	3-methyl-2-oxobutyrate
M21049	1,6-anhydroglucose
M21127	1-palmitoylglycerol (1-monopalmitin)
M21151	saccharin
M21184	1-oleoylglycerol (1-monoolein)
M21188	1-stearoylglycerol (1-monostearin)
M21630	X-08402
M22030	2-hydroxyisobutyrate
M22032	X-08766
M22116	4-methyl-2-oxopentanoate
M22130	phenyllactate (PLA)
M22138	homocitrulline
M22175	aspartylphenylalanine
M22177	levulinate (4-oxovalerate)
M22189	palmitoylcarnitine
M22481	X-08988
M22548	X-09026
M22649	X-09108
M22842	cholate
M24074	X-09706
M25459	X-10395
M25599	X-10429
M27256	X-10500
M27273	X-10506
M27278	X-10510
M27447	1-linoleoylglycerol (1-monolinolein)
M27513	indoleacetate
M27531	hyodeoxycholate
M27672	3-indoxyl sulfate
M27710	N-acetylglycine
M27716	bilirubin (Z,Z)
M27718	creatine
M27722	erythrose
M27728	glycerol 2-phosphate
M27738	threonate
M30805	X-10810
M31453	cysteine
M31522	pyroglutamylglycine
M31536	N-(2-furoyl)glycine
M31548	DSGEGDFXAEGGGVR*
M31555	pyridoxate
M31591	androsterone sulfate
M31787	3-carboxy-4-methyl-5-propyl-2-furanpropanoate (CMPF)
M32197	3-(4-hydroxyphenyl)lactate
M32198	acetylcarnitine
M32315	serine
M32319	trans-4-hydroxyproline
M32322	glutamate
M32328	hexanoylcarnitine
M32338	glycine
M32339	alanine
M32346	glycochenodeoxycholate
M32348	2-aminobutyrate
M32379	scyllo-inositol
M32388	dodecanedioate
M32393	gamma-glutamylvaline
M32405	indolepropionate
M32412	butyrylcarnitine
M32418	myristoleate (14:1n5)
M32425	dehydroisoandrosterone sulfate (DHEA-S)
M32445	3-methylxanthine
M32452	propionylcarnitine
M32489	caproate (6:0)
M32492	caprylate (8:0)
M32497	10-undecenoate (11:1n1)
M32504	docosapentaenoate (n3 DPA; 22:5n3)
M32518	X-11204
M32549	X-02269
M32553	phenol sulfate
M32557	X-06126
M32560	X-07765
M32564	X-11247
M32578	X-11261
M32586	bilirubin (E,E)*
M32587	X-02249
M32593	heme*
M32616	X-11299
M32632	X-11315
M32634	X-11317
M32635	1-linoleoylglycerophosphoethanolamine*
M32644	X-11327
M32651	X-11334
M32654	3-dehydrocarnitine*
M32672	pyroglutamine*
M32675	C-glycosyltryptophan*
M32691	X-11374
M32698	X-11381
M32709	X-03056
M32729	X-11412
M32735	X-01911
M32739	X-11422
M32740	X-11423
M32753	X-09789
M32754	X-11437
M32755	X-11438
M32757	X-11440
M32758	X-11441
M32759	X-11442
M32761	X-11444
M32762	X-11445
M32769	X-11452
M32786	X-11469
M32787	X-11470
M32795	X-11478
M32800	X-11483
M32802	X-11485
M32808	X-11491
M32814	X-11497
M32836	HWESASXX*
M32838	X-11521
M32846	X-11529
M32847	X-11530
M32854	X-11537
M32855	X-11538
M32857	X-11540
M32863	X-11546
M32867	X-11550
M32869	X-11552
M32910	X-11593
M32980	adrenate (22:4n6)
M33009	homostachydrine*
M33084	ADSGEGDFXAEGGGVR*
M33131	X-11786
M33132	X-11787
M33137	X-11792
M33138	X-11793
M33140	X-11795
M33144	X-11799
M33150	X-11805
M33163	X-11818
M33165	X-11820
M33173	2-hydroxyacetaminophen sulfate*
M33178	2-methoxyacetaminophen sulfate*
M33188	X-11843
M33190	X-11845
M33192	X-11847
M33194	X-11849
M33195	X-11850
M33197	X-11852
M33203	X-11858
M33204	X-11859
M33221	X-11876
M33228	1-arachidonoylglycerophosphocholine*
M33230	1-palmitoleoylglycerophosphocholine*
M33250	X-11905
M33353	X-12007
M33359	X-12013
M33363	gamma-glutamylmethionine*
M33364	gamma-glutamylthreonine*
M33380	X-12029
M33384	salicyluric glucuronide*
M33389	X-12038
M33390	X-12039
M33391	X-12040
M33408	X-12056
M33415	X-12063
M33420	gamma-tocopherol
M33422	gamma-glutamylphenylalanine
M33423	p-acetamidophenylglucuronide
M33441	isobutyrylcarnitine
M33442	pseudouridine
M33443	valerate
M33447	palmitoleate (16:1n7)
M33453	alpha-ketoglutarate
M33477	erythronate*
M33488	lathosterol
M33507	X-12092
M33508	X-12093
M33509	X-12094
M33510	X-12095
M33515	X-12100
M33531	X-12116
M33587	eicosenoate (20:1n9 or 11)
M33609	X-12188
M33610	X-12189
M33627	X-12206
M33633	X-12212
M33637	X-12216
M33638	X-12217
M33652	X-12230
M33653	X-12231
M33658	X-12236
M33666	X-12244
M33675	X-12253
M33683	X-12261
M33751	X-12329
M33782	X-10346
M33801	ADpSGEGDFXAEGGGVR*
M33821	1-eicosatrienoylglycerophosphocholine*
M33822	1-docosahexaenoylglycerophosphocholine*
M33833	X-12405
M33835	X-12407
M33864	X-12428
M33871	1-eicosadienoylglycerophosphocholine*
M33877	X-12435
M33883	X-12441
M33884	X-12442
M33885	X-12443
M33892	X-12450
M33901	X-12456
M33910	X-12465
M33935	piperine
M33936	octanoylcarnitine
M33937	alpha-hydroxyisovalerate
M33939	N-acetylthreonine
M33941	decanoylcarnitine
M33955	1-palmitoylglycerophosphocholine
M33957	1-heptadecanoylglycerophosphocholine
M33960	1-oleoylglycerophosphocholine
M33961	1-stearoylglycerophosphocholine
M33968	5-dodecenoate (12:1n7)
M33969	stearidonate (18:4n3)
M33971	10-heptadecenoate (17:1n7)
M33972	10-nonadecenoate (19:1n9)
M33973	epiandrosterone sulfate
M34035	linolenate [alpha or gamma; (18:3n3 or 6)]
M34040	X-12510
M34062	X-12524
M34106	bilirubin (E,Z or Z,E)*
M34109	metoprolol acid metabolite*
M34112	X-12544
M34123	X-12556
M34214	1-arachidonoylglycerophosphoinositol*
M34221	X-12627
M34244	X-12644
M34245	X-12645
M34283	asparagine
M34289	X-12680
M34306	X-12696
M34314	X-12704
M34322	X-12712
M34327	X-12717
M34329	X-12719
M34336	X-12726
M34338	X-12728
M34339	X-12729
M34344	X-12734
M34350	X-12740
M34359	X-12749
M34365	3-(cystein-S-yl)acetaminophen*
M34384	stachydrine
M34389	1-methylxanthine
M34390	7-methylxanthine
M34395	1-methylurate
M34400	1,7-dimethylurate
M34404	1,3,7-trimethylurate
M34407	isovalerylcarnitine
M34409	stearoylcarnitine
M34416	1-stearoylglycerophosphoethanolamine
M34419	1-linoleoylglycerophosphocholine
M34420	bradykinin, des-arg(9)
M34441	X-12771
M34453	X-12776
M34456	gamma-glutamylisoleucine*
M34469	X-12786
M34481	X-12798
M34499	X-12816
M34513	X-12830
M34516	X-12833
M34527	X-12844
M34530	X-12847
M34533	X-12850
M34534	laurylcarnitine
M34535	X-12851
M34539	X-12855
M34674	X-12990
M34732	isovalerate
M34761	X-13069
M34878	X-13183
M34912	X-13215
M35114	7-methylguanine
M35126	phenylacetylglutamine
M35127	pro-hydroxy-pro
M35137	N2,N2-dimethylguanosine
M35159	cysteine-glutathione disulfide
M35160	oleoylcarnitine
M35186	1-arachidonoylglycerophosphoethanolamine*
M35187	X-13429
M35189	X-13431
M35193	X-13435
M35240	X-13477
M35253	2-palmitoylglycerophosphocholine*
M35254	2-oleoylglycerophosphocholine*
M35255	2-stearoylglycerophosphocholine*
M35257	2-linoleoylglycerophosphocholine*
M35270	X-13496
M35305	1-palmitoylglycerophosphoinositol*
M35320	catechol sulfate
M35322	hydroquinone sulfate
M35326	X-13548
M35327	X-13549
M35331	X-13553
M35397	X-13619
M35431	2-methylbutyroylcarnitine
M35433	hydroxyisovaleroyl carnitine
M35439	glutaroyl carnitine
M35451	X-13658
M35464	X-13671
M35472	2-tetradecenoyl carnitine
M35527	4-hydroxyhippurate
M35551	X-13741
M35626	1-myristoylglycerophosphocholine
M35628	1-oleoylglycerophosphoethanolamine
M35631	1-palmitoylglycerophosphoethanolamine
M35635	3-(3-hydroxyphenyl)propionate
M35669	tetradecanedioate
M35675	2-hydroxypalmitate
M35678	hexadecanedioate
M35718	dihomo-linolenate (20:3n3 or n6)
M35754	X-13859
M35854	threitol
M35977	X-14056
M35978	X-14057
M36009	X-14086
M36095	thymol sulfate
M36097	4-acetaminophen sulfate
M36098	4-vinylphenol sulfate
M36099	4-ethylphenylsulfate
M36103	p-cresol sulfate
M36115	X-14189
M36131	X-14205
M36134	X-14208
M36230	X-14304
M36300	X-14374
M36376	X-14450
M36399	X-14473
M36468	X-14541
M36515	X-14588
M36552	X-14625
M36553	X-14626
M36559	X-14632
M36585	X-14658
M36589	X-14662
M36673	X-14745
M36738	gamma-glutamylglutamate
M36754	octadecanedioate
M36756	leucylleucine
M36776	7-alpha-hydroxy-3-oxo-4-cholestenoate (7-Hoca)
M36802	n-Butyl Oleate
M36808	dimethylarginine (SDMA + ADMA)
M36850	taurolithocholate 3-sulfate
M37004	X-14977
M37058	succinylcarnitine
M37097	tryptophan betaine
M37104	cyclo(leu-pro)
M37112	chiro-inositol
M37190	5alpha-androstan-3beta,17beta-diol disulfate
M37202	4-androsten-3beta,17beta-diol disulfate 1*
M37203	4-androsten-3beta,17beta-diol disulfate 2*
M37253	2-hydroxyglutarate
M37459	ergothioneine
M37506	palmitoyl sphingomyelin
M38150	phenylalanylphenylalanine
M38178	cis-4-decenoyl carnitine
M38768	15-methylpalmitate (isobar with 2-methylpalmitate)
